# Supplementary material
Source: PubMed Central journal article supplement (PMC5854505)

## Supplementary Information of

### Recent Advances of Controlled Drug Delivery Using Microfluidic Platforms

*Sharma T. Sanjay,<sup>+1</sup> Wan Zhou,<sup>+1</sup> Maowei Dou,<sup>+1,2</sup> Hamed Tavakoli,<sup>1</sup> Lei Ma,<sup>1</sup> Feng Xu,<sup>3</sup> XiuJun Li<sup>1,4,5,6\*</sup>*

<sup>1</sup>Department of Chemistry, <sup>4</sup>Border Biomedical Research Center, <sup>5</sup>Biomedical Engineering, and  
<sup>6</sup>Environmental Science and Engineering, University of Texas at El Paso, 500 West University Ave, El  
Paso, Texas, 79968, USA

<sup>2</sup>Environmental Molecular Sciences Laboratory, Pacific Northwest National Laboratory, Richland,  
Washington, 99354, USA

<sup>3</sup>Bioinspired Engineering and Biomechanics Center (BEBC), Xi'an Jiaotong University, Xi'an 710049,  
P.R. China

<sup>+</sup>: Denotes those authors contribute equally to this work

<sup>\*</sup>: Corresponding author: [xli4@utep.edu](mailto:xli4@utep.edu)

**Table S1. Transdermal drugs approved by US FDA\***

| <b>Drug</b>                       | <b>Product name</b> | <b>Dosage form</b>    | <b>Approval year</b> | <b>Indication</b>                          | <b>Marketing company</b>             |
|-----------------------------------|---------------------|-----------------------|----------------------|--------------------------------------------|--------------------------------------|
| Buprenorphine                     | Butrans             | Film/extended release | 2010                 | Opioid addiction                           | Purdue pharma LP                     |
| Clonidine                         | Catapres-TTS        | Film/extended release | 1984                 | Hypertension                               | Boehringer Ingelheim                 |
| Estradiol                         | Alora               | Film/extended release | 2002                 | Menopausal symptoms                        | Allergan sales LLC                   |
| Estradiol; Levonorgestrel         | Climara Pro         | Film/extended release | 2003                 | Menopausal symptoms                        | Noven pharmaceuticals Inc            |
| Estradiol; Norethindrone Acetate  | Combipatch          | Film/extended release | 1998                 | Menopausal symptoms                        | Bayer healthcare pharmaceuticals Inc |
| Ethinyl estradiol; Norelegstromin | Xulane              | Film/extended release | 2014                 | Contraception                              | Mylan technologies                   |
| Fentanyl                          | Duragesic           | Film/extended release | 1990                 | Chronic pain                               | Janssen pharmaceuticals Inc          |
| Fentanyl hydrochloride            | Ionsys              | System/Iontophoresis  | 2006                 | Acute postoperative pain                   | The medicines Co                     |
| Granisetron                       | Sancuso             | Film/extended release | 2008                 | Nausea and vomiting after cancer treatment | Kyowa kiran Inc                      |
| Methylphenidate                   | Daytrana            | Film/extended release | 2006                 | Attention deficit hyperactivity disorder   | Noven pharmaceuticals Inc            |
| Nicotine                          | Habitrol            | Film/extended release | 1999                 | Smoking cessation                          | Dr reddys laboratories Inc           |
| Nitroglycerin                     | Minitran            | Film/extended release | 1996                 | Angina pectoris                            | Valeant Pharmaceuticals              |
| Oxybutynin                        | Oxybutynin          | Film/extended release | 2014                 | Bladder relaxant                           | Barr Laboratories Inc                |
| Oxybutynin chloride               | Gelnique            | Gel                   | 1009                 | Bladder relaxant                           | Allergan sales LLC                   |
| Rivastigmine                      | Exelon              | Film/extended release | 2007                 | Dementia                                   | Novartis pharmaceuticals corp        |
| Rotigotine                        | Neupro              | Film/extended release | 2012                 | Parkinson's disease                        | UCB Inc                              |
| Scopolamine                       | Scopolamine         | Film/extended release | 2015                 | Motion sickness                            | Perrigo pharmaceuticals Co           |
| Selegiline                        | Emsam               | Film/extended release | 2006                 | Major depressive disorder                  | Somerset pharmaceuticals Inc         |
| Testosterone                      | Androderm           | Film/extended release | 2011                 | Testosterone deficiency                    | Allergan sales LLC                   |

\*Only one approved product for a given drug formulation is shown. Data were obtained from an FDA orange book. ([http://www.accessdata.fda.gov/scripts/cder/ob/search\\_product.cfm](http://www.accessdata.fda.gov/scripts/cder/ob/search_product.cfm))

**Table S2. Chemical structures and formulas of small molecular drugs in the order as mentioned in Table 1 and 2.**

|                                                                                                                                                                                         |                                                                                                                                                                                         |
|-----------------------------------------------------------------------------------------------------------------------------------------------------------------------------------------|-----------------------------------------------------------------------------------------------------------------------------------------------------------------------------------------|
| <p style="text-align: center;"><b>Rhodamine B</b><br/>Formula: <math>C_{28}H_{31}ClN_2O_3</math></p> 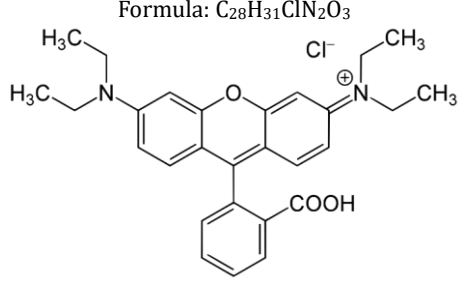  | <p style="text-align: center;"><b>Ampicillin</b><br/>Formula: <math>C_{16}H_{19}N_3O_4S</math></p>    |
| <p style="text-align: center;"><b>Diclofenac</b><br/>Formula: <math>C_{14}H_{11}Cl_2NO_2</math></p>    | <p style="text-align: center;"><b>Celecoxib</b><br/>Formula: <math>C_{17}H_{14}F_3N_3O_2S</math></p>  |
| <p style="text-align: center;"><b>Ketoprofen</b><br/>Formula: <math>C_{16}H_{14}O_3</math></p>       | <p style="text-align: center;"><b>Tretinoin</b><br/>Formula: <math>C_{20}H_{28}O_2</math></p>       |
| <p style="text-align: center;"><b>Doxorubicin</b><br/>Formula: <math>C_{27}H_{29}NO_{11}</math></p>  | <p style="text-align: center;"><b>Paclitaxel</b><br/>Formula: <math>C_{47}H_{51}NO_{14}</math></p>  |
| <p style="text-align: center;"><b>Phenylephrine</b><br/>Formula: <math>C_9H_{13}NO_2</math></p>      | <p style="text-align: center;"><b>5-fluorouracil</b><br/>Formula: <math>C_4H_3FN_2O_2</math></p>    |

Clindamycin Phosphate

Formula:  $C_{18}H_{34}ClN_2O_8PS$

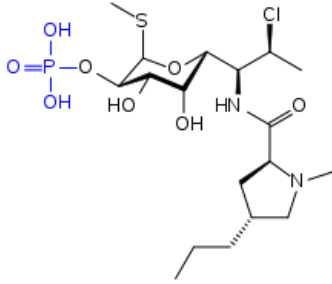

Docetaxel

Formula:  $C_{43}H_{53}NO_{14}$

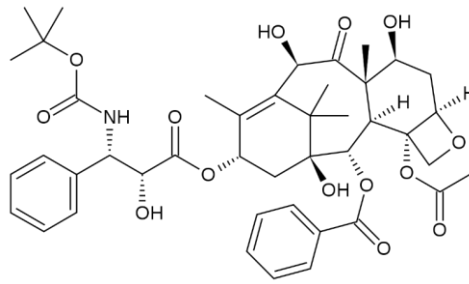

Dihydroartemisinin

Formula:  $C_{15}H_{24}O_5$

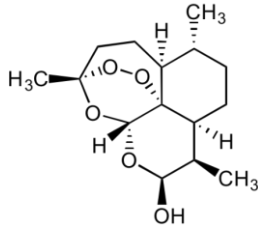

Heparin

Formula:  $C_{10}H_{19}NO_{20}S_3$

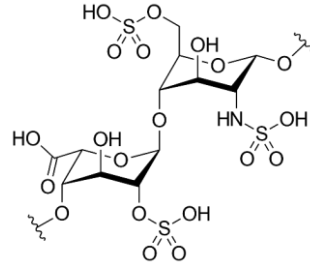

Combretastatin A4

Formula:  $C_{18}H_{20}O_5$

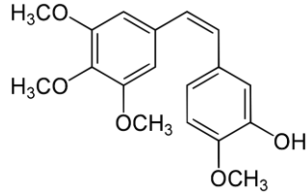

Verapamil

Formula:  $C_{27}H_{38}N_2O_4$

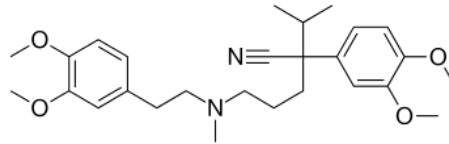

Amlodipine

Formula:  $C_{20}H_{25}ClN_2O_5$

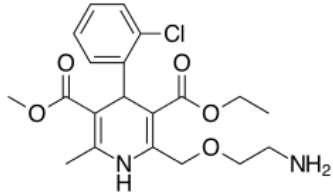

Tiagabine

Formula:  $C_{20}H_{25}NO_2S_2$

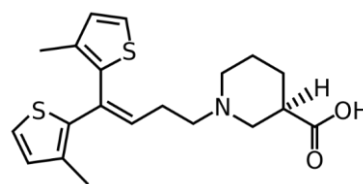

Carbamazepine

Formula:  $C_{20}H_{25}NO_2S_2$

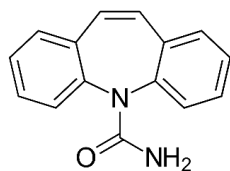

Naltrexone

Formula:  $C_{20}H_{23}NO_4$

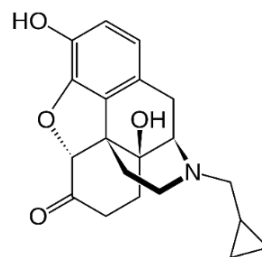

---

Lidocaine

Formula:  $C_{14}H_{22}N_2O$

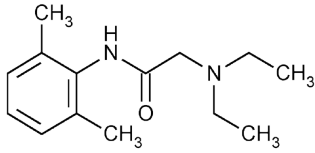

Polystyrene

Formula:  $(C_8H_8)_n$

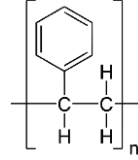

Sulforhodamine B

Formula:  $C_{27}H_{30}N_2O_7S_2$

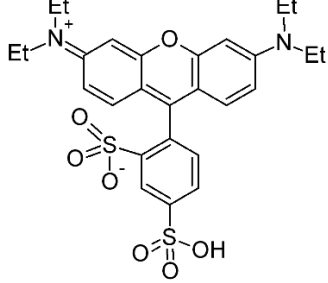

Sunitinib

Formula:  $C_{22}H_{27}FN_4O_2$

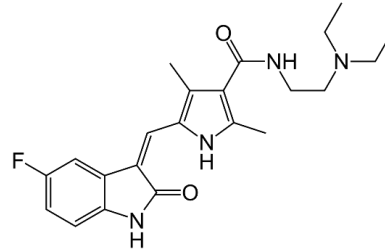

Curcumin

Formula:  $C_{21}H_{20}O_6$

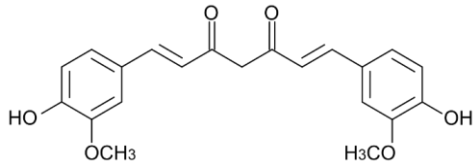

Cisplatin

Formula:  $Cl_2H_4N_2Pt$

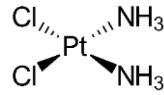

Dacarbazine

Formula:  $C_6H_{10}N_6O$

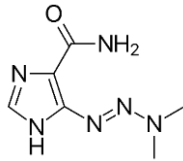

Methotrexate

Formula:  $C_{20}H_{22}N_8O_5$

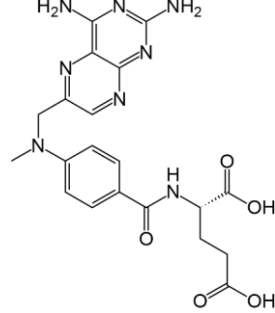

Supplement: NIHMS906522-supplement.pdf [file NIHMS906522-supplement.pdf]
